# Supplementary material for: A Mobile App (iBeni) With a Neuropsychological Basis for Cognitive Stimulation for Elderly Adults: Pilot and Validation Study
Source: PubMed Central journal article supplement (PMC6123536; doi:10.2196/resprot.9603), 2018-08-21
Supplement: resprot_v7i8e172_app1.pdf [file resprot_v7i8e172_app1.pdf]

Table 1. Cognitive Interventions based on ICT Reported by Type of intervention, N, Country, Cognitive Functions and Significant Findings

| <b>Study</b>                                 | <b>Type of intervention</b>                                                   | <b>Duration</b> | <b>N</b>                                                                  | <b>Country</b> | <b>Cognitive Functions Evaluated</b>                                                               | <b>Significant Findings</b>                                                                                                                                                                   |
|----------------------------------------------|-------------------------------------------------------------------------------|-----------------|---------------------------------------------------------------------------|----------------|----------------------------------------------------------------------------------------------------|-----------------------------------------------------------------------------------------------------------------------------------------------------------------------------------------------|
| Walton, et. al. 2015 [27]                    | Cognitive training; active control group                                      | 28 days         | 28 healthy older adults (mean age 67.4)                                   | Australia      | Visual, and executive functions, memory, Arithmetic, attention                                     | Improved performance in multiple measures of processing speed; visual working memory can be enhanced over a short period of computerized cognitive training.                                  |
| <a href="#">Zygouris</a> , et. al. 2015 [28] | Cognitive assessment: Application: Virtual Supermarket                        | Not specified   | 55 older subjects, 21 healthy older adults and 34 older subjects with MCI | Greece         | Not specified                                                                                      | The virtual supermarket appears to be a valid method of screening for MCI in an older adult population though it cannot be used for mild cognitive impairment subtype assessment.             |
| Zorluoglu, et. al. 2015 [29]                 | Cognitive assessment: Mobile cognitive screening (MCS); active control group. | Not specified   | 23 older subjects with MCI (mean age 81.78)                               | Turkey         | Arithmetic, orientation, abstraction, attention, memory, language, visual, and executive functions | The proposed test was able to differentiate the individuals in the control and dementia groups for executive, visual, memory, attention, orientation functions with statistical significance. |
| Yasini, et. al. 2016 [30]                    | Cognitive Stimulation: Mobile Health                                          | 6 months        | 15 older subjects                                                         | France         | Memory, attention, concentration                                                                   | The results are promising and can pave the way for improving                                                                                                                                  |

|                          |                                                                           |               |                               |        |                                                                                  |                                                                                                                                                                                                                                                                                                                               |
|--------------------------|---------------------------------------------------------------------------|---------------|-------------------------------|--------|----------------------------------------------------------------------------------|-------------------------------------------------------------------------------------------------------------------------------------------------------------------------------------------------------------------------------------------------------------------------------------------------------------------------------|
|                          | Application, Stim'Art.                                                    |               |                               |        |                                                                                  | cognitive function in the elderly patients. The use of tablets and the constitution of serious games in close cooperation with health professionals and elderly patients (the end user), are likely to provide satisfactory results to improve healthcare provided for elderly patients suffering from cognitive disorders.   |
| Chang, et. al. 2016 [31] | Cognitive training: The iPad intervention program; active control groups. | 10 weeks      | 11 older subjects (age 60-90) | USA    | Processing speed<br>Mental control<br>Episodic memory<br>Visuospatial processing | The results yielded evidence for greater improvement over time in the iPad intervention compared with the control groups for processing speed and episodic memory. Thus, the program was successful at improving cognitive performances through productive engagement and provided an added benefit of technological mastery. |
| Lu, et. al. 2017 [32]    | Cognitive training games: Mobile game                                     | Not specified | 9 older subjects (age 82-90)  | Taiwan | Attention<br>Executive function<br>Memory<br>Lenguaje<br>Visuospatial function   | The results showed that the cognitive training game developed in this study was accepted by the participants, and a high degree of satisfaction was noted. Moreover, the elements of the interface, including its size, layout and control flow, were tested and found to be suitable for use.                                |

|                                                       |                                                                                                   |                |                                                                            |                 |                                                                                        |                                                                                                                                                                                                                                                                                                                                                                                                                                 |
|-------------------------------------------------------|---------------------------------------------------------------------------------------------------|----------------|----------------------------------------------------------------------------|-----------------|----------------------------------------------------------------------------------------|---------------------------------------------------------------------------------------------------------------------------------------------------------------------------------------------------------------------------------------------------------------------------------------------------------------------------------------------------------------------------------------------------------------------------------|
| <p><a href="#">Shellington, et. al. 2017 [33]</a></p> | <p>Cognitive Stimulation:<br/>Mobile application:<br/>HealtheBrain app.</p>                       | <p>3 weeks</p> | <p>19 older subjects (mean age 68.3)</p>                                   | <p>Canada</p>   | <p>Memory by walking simple patterns at home or anywhere</p>                           | <p>Sixty percent found the app was easy to use or similar to what they experienced with square-stepping exercise in the laboratory setting. Most said they would continue to use the HealtheBrain app and would recommend it to friends and family. The authors believe that their findings in a representative cohort support the HealtheBrain app as a scalable intervention to promote cognitive health in older adults.</p> |
| <p>Han, et. al. 2017 [34]</p>                         | <p>Cognitive training<br/>Tablet-based Spaced retrieval training program: USMART.</p>             | <p>4 weeks</p> | <p>20 older subjects with MCI</p>                                          | <p>Korea</p>    | <p>Word List Memory Test<br/>Word List Recall Test<br/>Word List Recognition Test.</p> | <p>The USMART group had larger improvements in Word List Recall Test score than the usual care group. There were no significant differences in other primary or secondary measures between the USMART and usual care groups. Moreover, no USMART-related adverse events were reported.</p>                                                                                                                                      |
| <p>Pereira-Morales, et. al. 2018 [35]</p>             | <p>Cognitive training<br/>Web platform:<br/>Cognitive training program; active control group.</p> | <p>8 weeks</p> | <p>12 older subjects with subjective memory complaints (mean age 66.4)</p> | <p>Colombia</p> | <p>Psychostimulation program</p>                                                       | <p>This study suggested that cognitive training of moderate intensity, supported by a web platform, could lead to significant improvements in cognitive and psychological well-being in older people with subjective memory complaints.</p>                                                                                                                                                                                     |
